# Supplementary material
Source: MDPI journal article supplement (https://www.mdpi.com/2076-3263/12/6/220)
Supplement: s1 [file s1]

# Supplementary Materials: The Arkalochori Mw = 5.9 Earthquake of 27 September 2021 Inside the Heraklion Basin: A Shallow, Blind Rupture Event Highlighting the Orthogonal Extension of Central Crete

**Table S1.** Data from the EMSC web pages of the seven major foreshocks, the Mw = 6 mainshock of September 27 and the main Mw = 5.3 aftershock of September 28, 2021.

| Date (in 2021) | Time UTC | Magnitude and type | Intensity | Testimonies | EMSC link                                                                                                                                                       |
|----------------|----------|--------------------|-----------|-------------|-----------------------------------------------------------------------------------------------------------------------------------------------------------------|
| 4/6            | 1:05     | 4.6 mb             | IV        | 93          | <a href="https://www.emsc-csem.org/Earthquake/Testimonies/comments.php?id=992375">https://www.emsc-csem.org/Earthquake/Testimonies/comments.php?id=992375</a>   |
| 2/7            | 19:46    | 4.2 mb             | IV        | 119         | <a href="https://www.emsc-csem.org/Earthquake/Testimonies/comments.php?id=1005840">https://www.emsc-csem.org/Earthquake/Testimonies/comments.php?id=1005840</a> |
| 5/7            | 20:40    | 4.2 ML             | IV        | 117         | <a href="https://www.emsc-csem.org/Earthquake/Testimonies/comments.php?id=1006719">https://www.emsc-csem.org/Earthquake/Testimonies/comments.php?id=1006719</a> |
| 18/7           | 4:56     | 4.4 mb             | IV        | 58          | <a href="https://www.emsc-csem.org/Earthquake/Testimonies/comments.php?id=1010729">https://www.emsc-csem.org/Earthquake/Testimonies/comments.php?id=1010729</a> |
| 20/7           | 17:44    | 4.2 ML             | IV        | 70          | <a href="https://www.emsc-csem.org/Earthquake/Testimonies/comments.php?id=1011547">https://www.emsc-csem.org/Earthquake/Testimonies/comments.php?id=1011547</a> |
| 24/7           | 2:07     | 4.8 ML             | V         | 208         | <a href="https://www.emsc-csem.org/Earthquake/Testimonies/comments.php?id=1012874">https://www.emsc-csem.org/Earthquake/Testimonies/comments.php?id=1012874</a> |
| 8/8            | 19:15    | 4.2 mb             | IV        | 45          | <a href="https://www.emsc-csem.org/Earthquake/Testimonies/comments.php?id=1021061">https://www.emsc-csem.org/Earthquake/Testimonies/comments.php?id=1021061</a> |
| 27/9           | 6:17     | 6 Mw               | VI        | 346         | <a href="https://www.emsc-csem.org/Earthquake/Testimonies/comments.php?id=1041084">https://www.emsc-csem.org/Earthquake/Testimonies/comments.php?id=1041084</a> |
| 28/9           | 4:48     | 5.3 Mw             | V         | 278         | <a href="https://www.emsc-csem.org/Earthquake/Testimonies/comments.php?id=1041541">https://www.emsc-csem.org/Earthquake/Testimonies/comments.php?id=1041541</a> |

**Table S2.** Moment tensor solutions of events with Mw ≥ 4.0. The events are plotted on the map of Fig. 3.

| Origin<br>yyymmdd<br>hh:mm:ss | Centroid<br>Latitude<br>(o) | Centroid<br>Longitude<br>de | Centroid<br>Depth | Strike<br>(o) | Dip<br>(o) | Rake<br>(o) | Moment<br>Mo<br>(Nm) | Mw | VR<br>(%) | DC<br>(%) |
|-------------------------------|-----------------------------|-----------------------------|-------------------|---------------|------------|-------------|----------------------|----|-----------|-----------|
|-------------------------------|-----------------------------|-----------------------------|-------------------|---------------|------------|-------------|----------------------|----|-----------|-----------|

|                    |         | (o)     | (Km) |     |    |      |           |     |      |       |  |
|--------------------|---------|---------|------|-----|----|------|-----------|-----|------|-------|--|
| 210604<br>01:05:26 | 35.2154 | 25.2531 | 12.9 | 0   | 63 | -128 | 1.300e+15 | 4.0 | 54.0 | 50.30 |  |
| 210724<br>02:07:37 | 35.1118 | 25.2333 | 8.0  | 43  | 37 | -82  | 9.116e+15 | 4.6 | 63.3 | 64.60 |  |
| 210927<br>06:17:24 | 35.1429 | 25.4340 | 6.0  | 25  | 33 | -81  | 8.663e+17 | 5.9 | 61.3 | 97.20 |  |
| 210927<br>07:30:45 | 35.0361 | 25.2495 | 12.0 | 4   | 41 | -172 | 5.304e+15 | 4.4 | 62.2 | 58.80 |  |
| 210927<br>08:21:59 | 35.2523 | 25.3098 | 3.0  | 232 | 63 | -97  | 6.232e+15 | 4.5 | 50.4 | 46.30 |  |
| 210927<br>11:02:25 | 35.0482 | 25.2548 | 3.0  | 15  | 80 | -93  | 7.537e+15 | 4.6 | 58.8 | 71.60 |  |
| 210927<br>20:09:59 | 35.1712 | 25.2041 | 11.0 | 270 | 79 | -36  | 2.107e+15 | 4.2 | 46.5 | 38.10 |  |
| 210927<br>21:37:09 | 35.1467 | 25.2739 | 4.0  | 55  | 36 | -63  | 1.967e+15 | 4.2 | 42.2 | 71.10 |  |
| 210928<br>04:48:06 | 35.2470 | 25.2249 | 5.0  | 5   | 64 | -112 | 4.635e+16 | 5.1 | 57.4 | 81.20 |  |
| 210928<br>15:13:14 | 35.1501 | 25.2775 | 7.0  | 31  | 35 | -91  | 5.326e+15 | 4.5 | 60.3 | 74.90 |  |
| 210929<br>11:54:49 | 35.1439 | 25.2058 | 8.0  | 21  | 51 | -95  | 2.011e+15 | 4.2 | 58.8 | 77.40 |  |
| 211020<br>02:44:05 | 35.1505 | 25.3089 | 16.0 | 286 | 55 | 25   | 1.715e+15 | 4.1 | 62.1 | 63.60 |  |
| 211021<br>08:12:57 | 35.0936 | 25.2538 | 7.0  | 256 | 48 | -55  | 2.478e+15 | 4.2 | 62.5 | 40.90 |  |
| 211021<br>09:38:30 | 35.0426 | 25.2533 | 21.0 | 237 | 29 | 111  | 3.006e+15 | 4.3 | 52.2 | 46.60 |  |
| 211022<br>10:11:31 | 35.1052 | 25.3221 | 11.0 | 8   | 59 | -135 | 1.285e+15 | 4.0 | 60.2 | 98.00 |  |
| 211229<br>23:06:40 | 35.1332 | 25.2021 | 9.0  | 9   | 54 | -138 | 9.649e+14 | 4.0 | 93.3 | 79.20 |  |





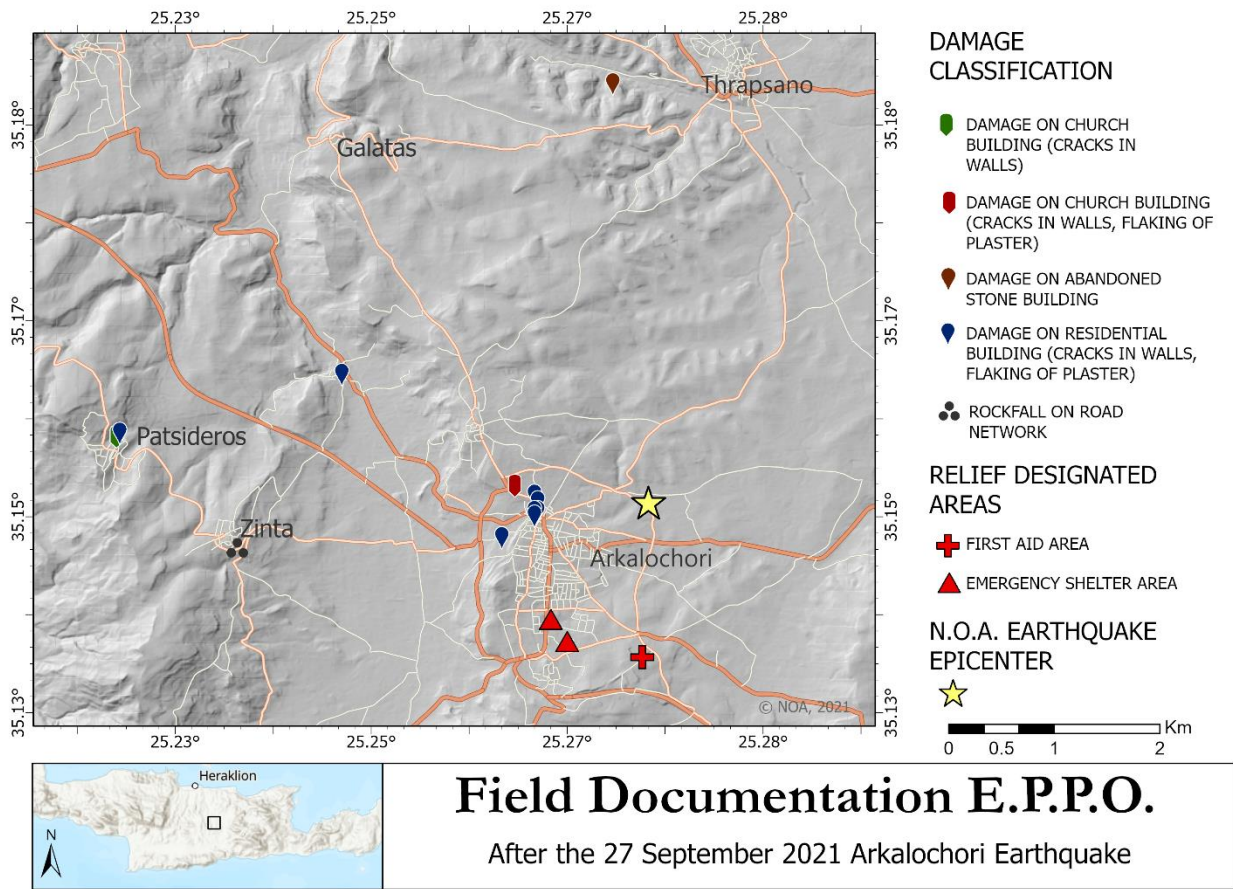

**Figure S2.** Map showing damage locations according to EPPO field report (communicated to Athanassios Ganas on 22 October 2021)

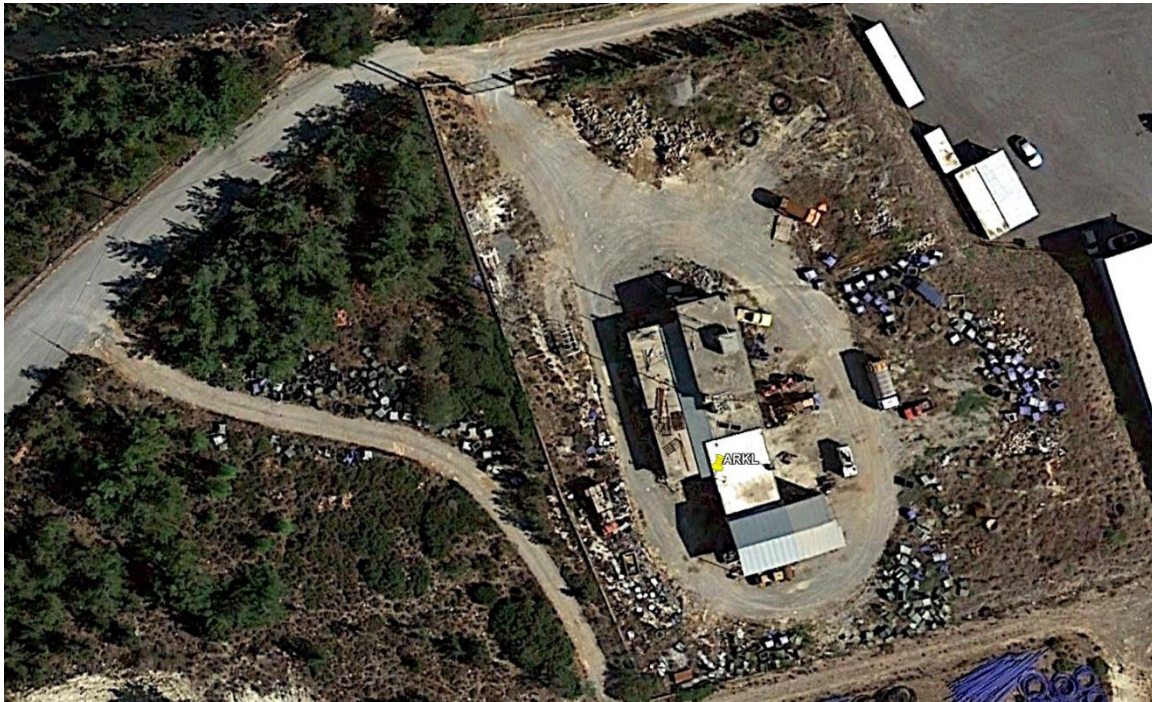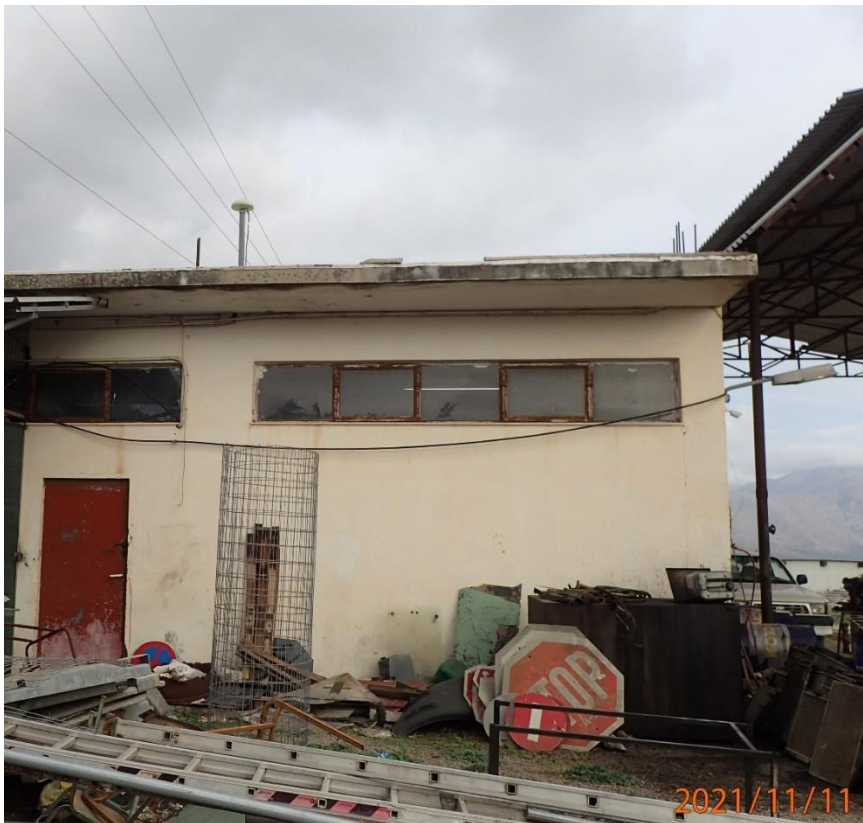

**Figure S3.** Field photograph of the ARKL station antenna (top google earth view – bottom building photo looking east; photo taken by Athanassios Ganas, Nov. 11, 2021)

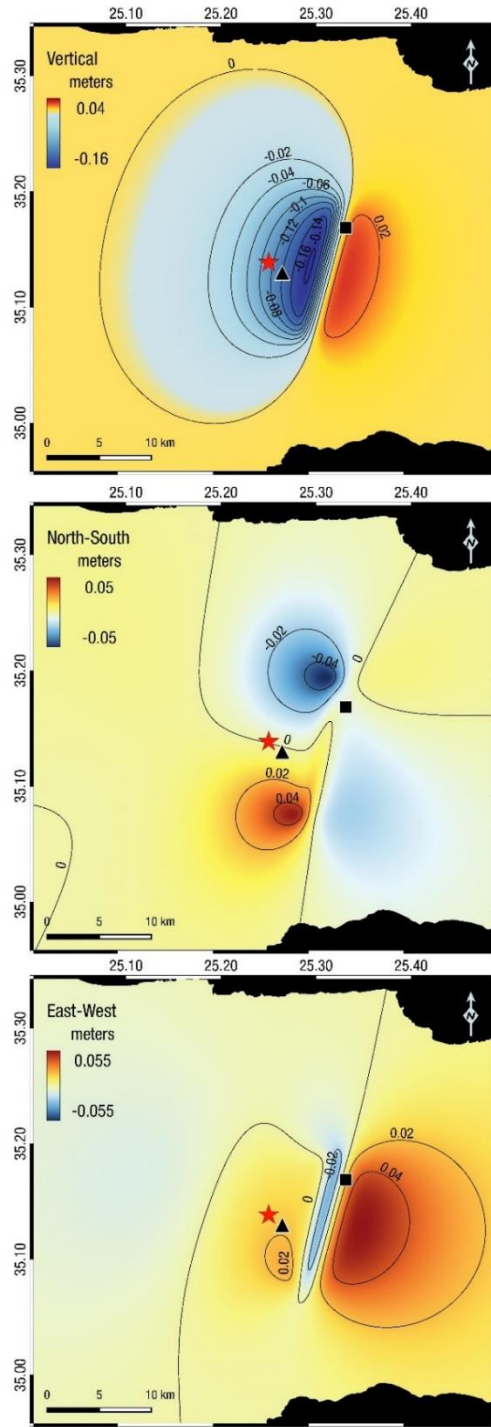

**Figure S4.** Ground displacement maps predicted by an Okada-type dislocation model (west-dipping; using parameters of Table 3 with uniform slip 0.2 m), assuming elastic half-space. Black triangle shows the location of GNSS station ARKL. Black square shows the location of GPS benchmark AS15.



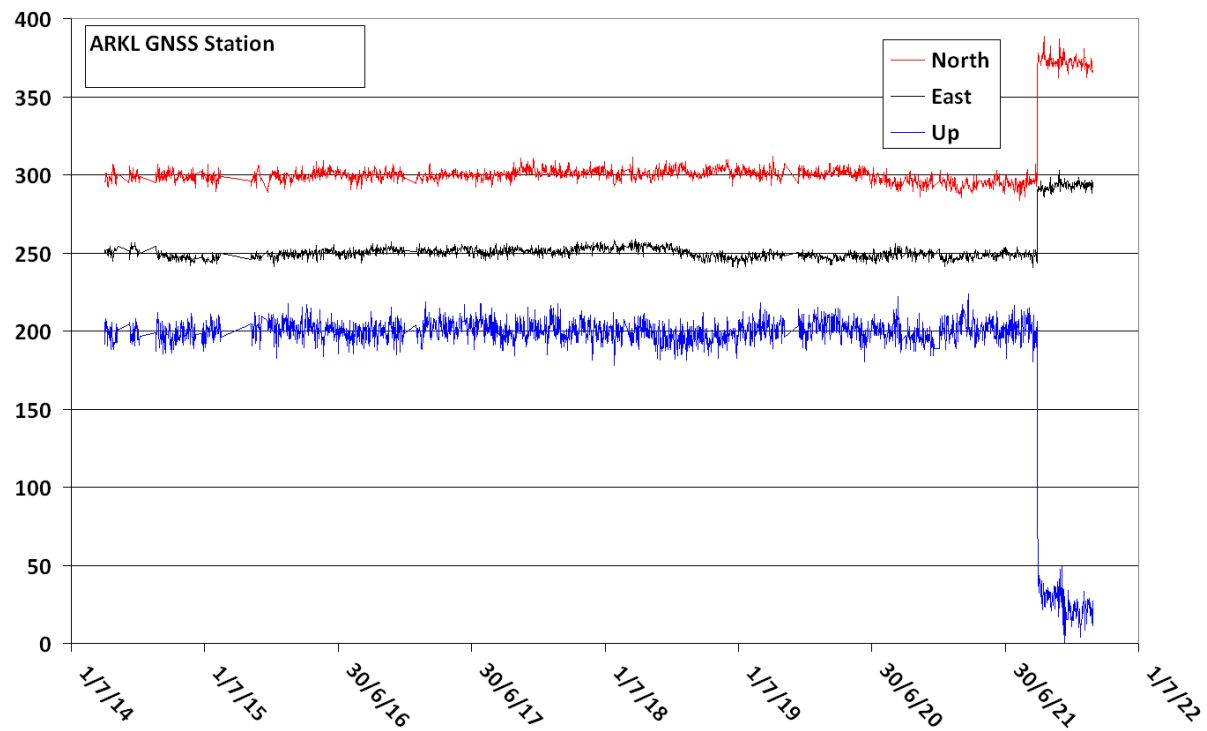

**Figure S5.** Position time series (reference frame ITRF2014) of the GNSS ARKL station (offset on the Y-axis for clarity). A small post-seismic motion is visible on the vertical (Up) component. The time series are detrended of the secular velocity of the station.

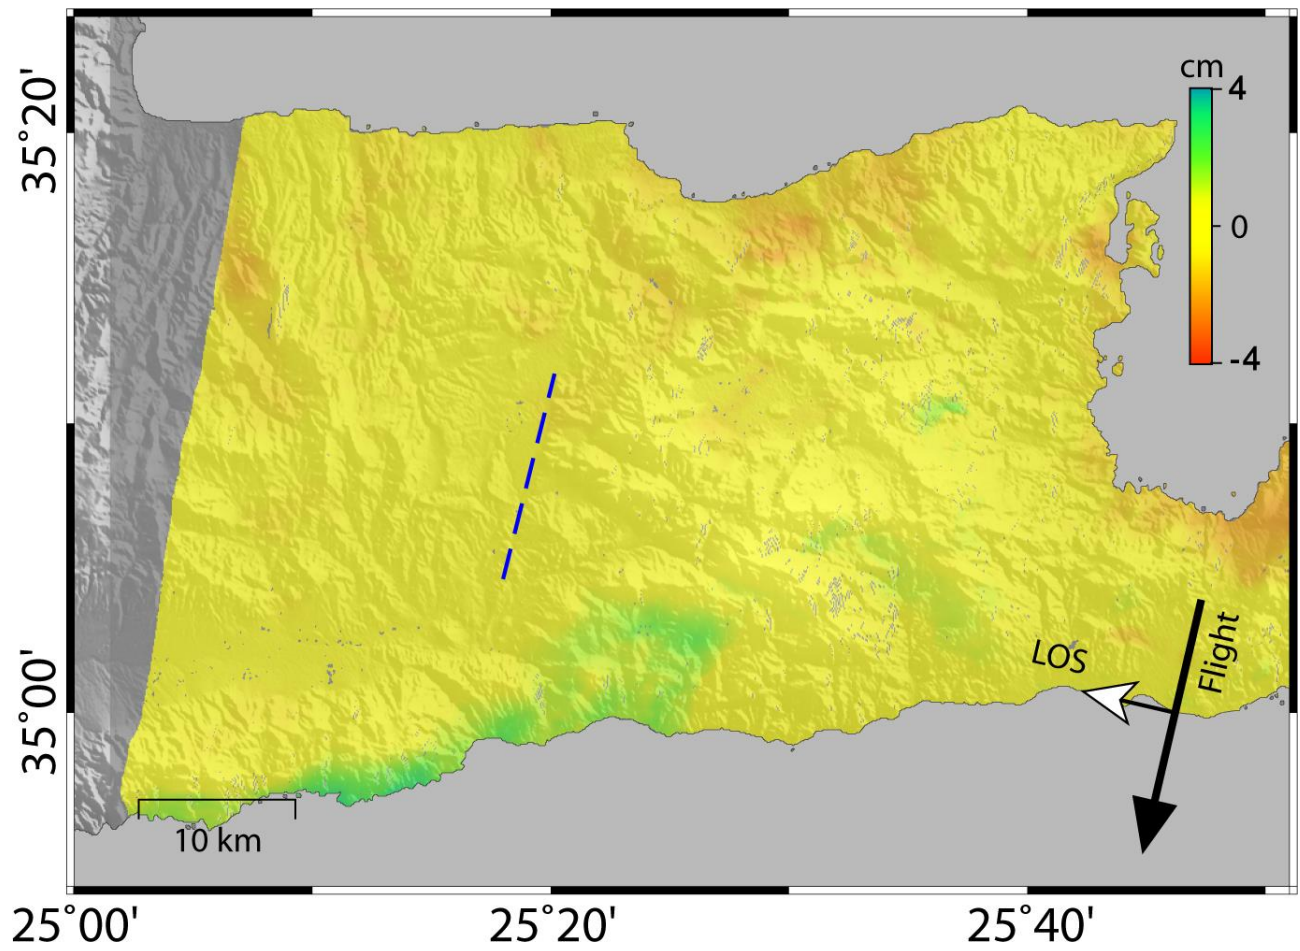

**Figure S6.** InSAR data from 1-13 October 2021 showing no clear evidence for surface deformation 3-16 days after the earthquake.



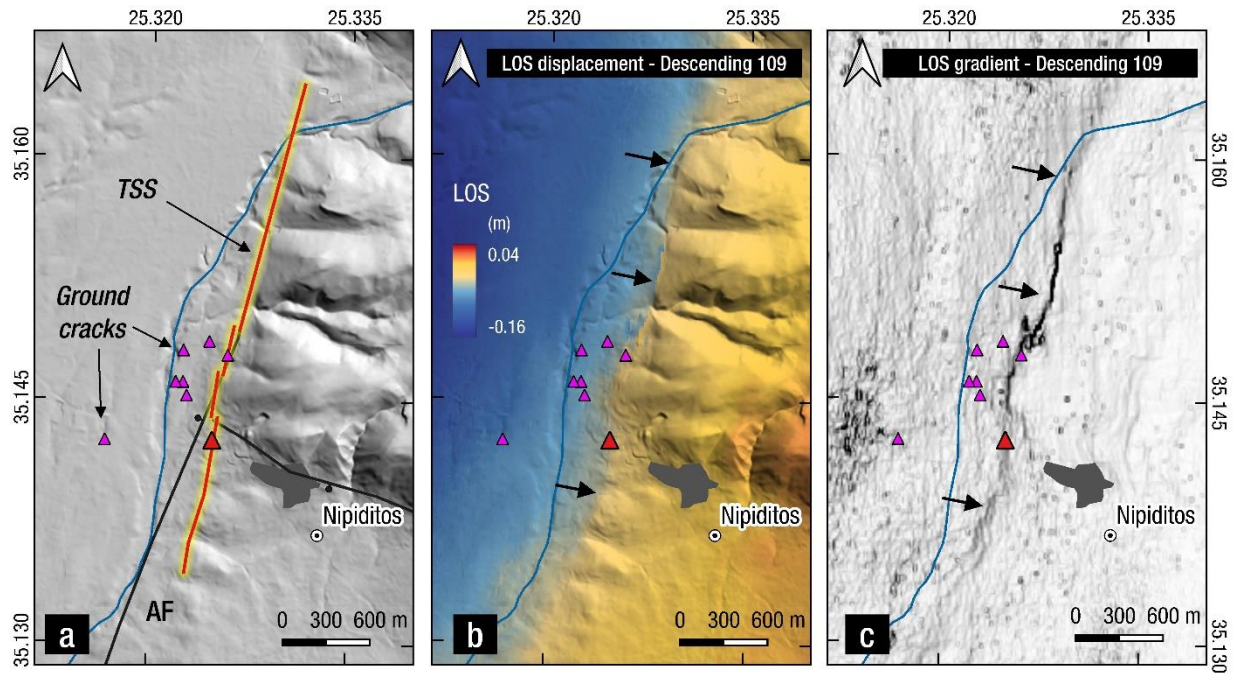

**Figure S7a.** Linear displacement feature (triggered shallow slip, TSS) observed along the Avli (Lagouta) segment. Ground cracks observed in the field (triangles) and shallow displacement feature (red line) traced from the LOS displacement (b and c).

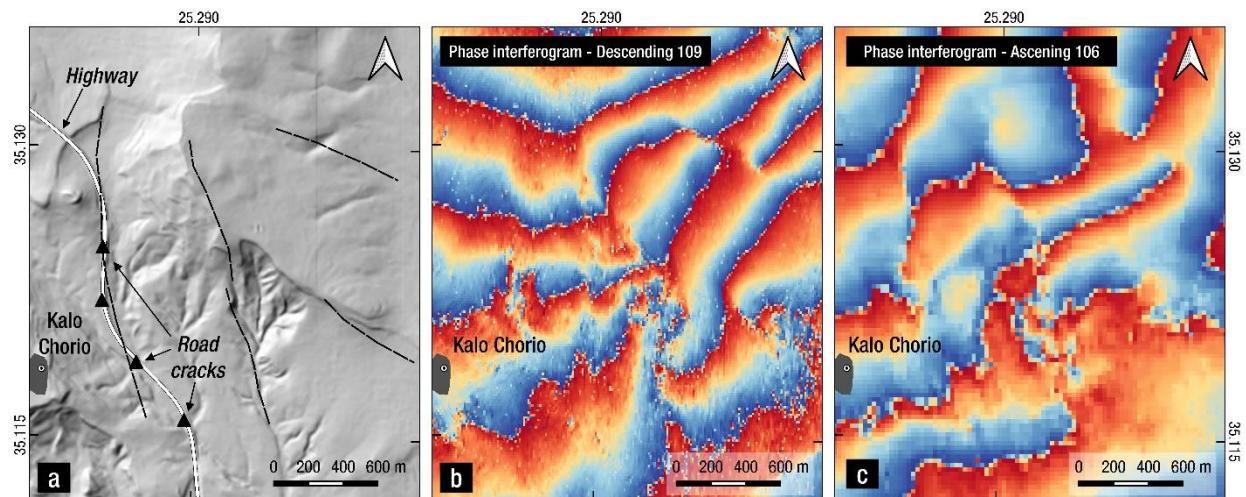

**Figure S7b.** Triggered shallow slip features (TSS) southeast from Arkalochori. Road cracks observed in the field along Heraklion-Arkalochori motorway (triangles in a). TSS traces (black dashed lines in a) are visible as discontinuities in both descending and ascending track phase interferograms (b & c).

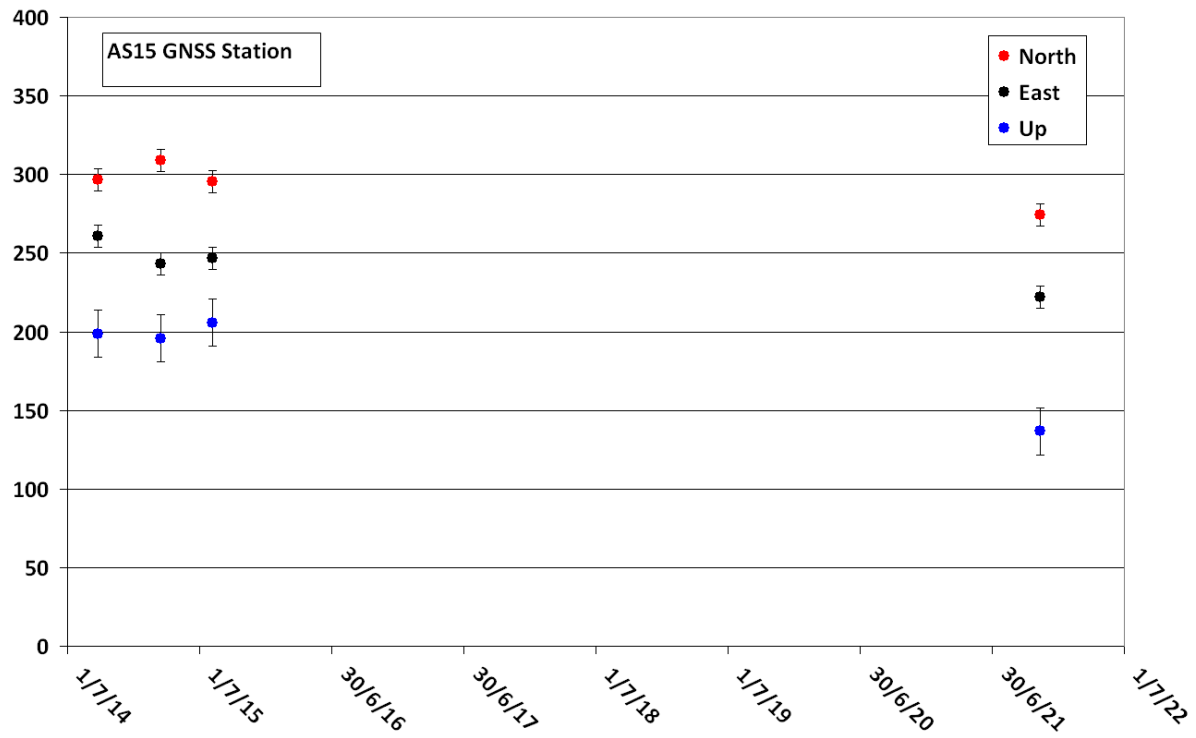

**Figure S8.** Time series plot of the coordinates of AS15. The plot is detrended of the secular velocity (we used the velocity of the nearby station ARKL, i.e;  $v_E=8.4$  and  $v_N=-13.7$  mm/yr).

The co-seismic displacement is  $dE = -28 \pm 6$  mm,  $dN = -25 \pm 6$  mm,  $dU = -63 \pm 15$  mm
